# Supplementary material
Source: publisher figshare collection journal article supplement (https://asha.figshare.com/ndownloader/files/39916963)
Supplement: Supplementary file 1 [file 39916963]

**Supplemental Material S1. Reading skills of individual participants.**

| Participant | Reading Group (H or L) | Passed Post-Test? | Rhyming | ID first Sound | ID last Sound | ID middle Sound | ID letter sounds | Decode CVC words | Decode multiple word families | ID sight words | Read sentences | Read simple texts | Read complex texts | Read fluently | Monitor comprehension |
|-------------|------------------------|-------------------|---------|----------------|---------------|-----------------|------------------|------------------|-------------------------------|----------------|----------------|-------------------|--------------------|---------------|-----------------------|
| 1           | H                      | Y                 |         | Y              |               |                 | Y                | Y                |                               |                |                | Y                 | Y                  | Y             |                       |
| 6           | H                      | Y                 | Y       | Y              | Y             | Y               | Y                | Y                | Y                             | Y              | Y              | Y                 |                    |               |                       |
| 7           | H                      | Y                 | Y       | Y              | Y             | Y               | Y                | Y                | Y                             | Y              | Y              | Y                 |                    |               |                       |
| 8           | H                      | Y                 | Y       | Y              | Y             | Y               | Y                | Y                | Y                             | Y              | Y              | Y                 |                    |               |                       |
| 10          | H                      | Y                 |         | Y              |               |                 | Y                | Y                | Y                             | Y              | Y              | Y                 |                    | Y             | Y                     |
| 11          | H                      | Y                 |         | Y              | Y             |                 | Y                | Y                | Y                             | Y              | Y              | Y                 |                    |               |                       |
| 12          | H                      | Y                 | Y       | Y              |               |                 | Y                | Y                | Y                             | Y              | Y              | Y                 |                    |               |                       |
| 19          | H                      | Y                 | Y       | Y              | Y             | Y               | Y                | Y                | Y                             | Y              | Y              | Y                 |                    | Y             | Y                     |
| 16          | H                      | N                 | Y       | Y              | Y             | Y               | Y                | Y                | Y                             | Y              | Y              | Y                 |                    |               |                       |
| 4           | L                      | Y                 |         |                |               |                 |                  |                  |                               |                |                |                   |                    |               |                       |
| 17          | L                      | Y                 | Y       |                |               |                 | Y                |                  |                               | Y              |                |                   |                    |               |                       |
| 18          | L                      | Y                 |         |                |               |                 |                  |                  |                               |                | Y              |                   |                    |               |                       |
| 2           | L                      | N                 |         | Y              |               |                 |                  | Y                |                               | Y              |                |                   |                    |               |                       |
| 3           | L                      | N                 |         |                |               |                 |                  |                  |                               |                |                |                   |                    |               |                       |
| 5           | L                      | N                 |         |                |               |                 |                  |                  |                               |                |                |                   |                    |               |                       |
| 9           | L                      | N                 |         |                |               |                 |                  |                  |                               |                |                |                   |                    |               |                       |
| 13          | L                      | N                 |         |                |               |                 |                  |                  |                               |                |                |                   |                    |               |                       |
| 14          | L                      | N                 |         |                |               |                 |                  |                  |                               |                |                |                   |                    |               |                       |
| 15          | L                      | N                 |         | Y              | Y             |                 |                  | Y                |                               |                | Y              |                   |                    |               |                       |
| 20          | L                      | N                 |         |                |               |                 |                  |                  |                               |                |                |                   |                    |               |                       |
| 21          | L                      | N                 |         |                |               |                 |                  |                  |                               |                |                |                   |                    |               |                       |
| 22          | L                      | N                 |         |                |               |                 |                  |                  |                               |                |                |                   |                    |               |                       |

*Note.* H = high reading group; L = low reading group; Y = yes; N = no; ID = identify.
